# Supplementary material for: Enhancing Stroke Rehabilitation with Whole-Hand Haptic Rendering: Development and Clinical Usability Evaluation of a Novel Upper-Limb Rehabilitation Device
Source: Research Square preprint supplement (doi:10.21203/rs.3.rs-4155027/v1), 2024-03-28
Supplement: Supplementary file [file 10fdadb6b3e989bd54c0ca5f.pdf]

# LAMBDA.3+

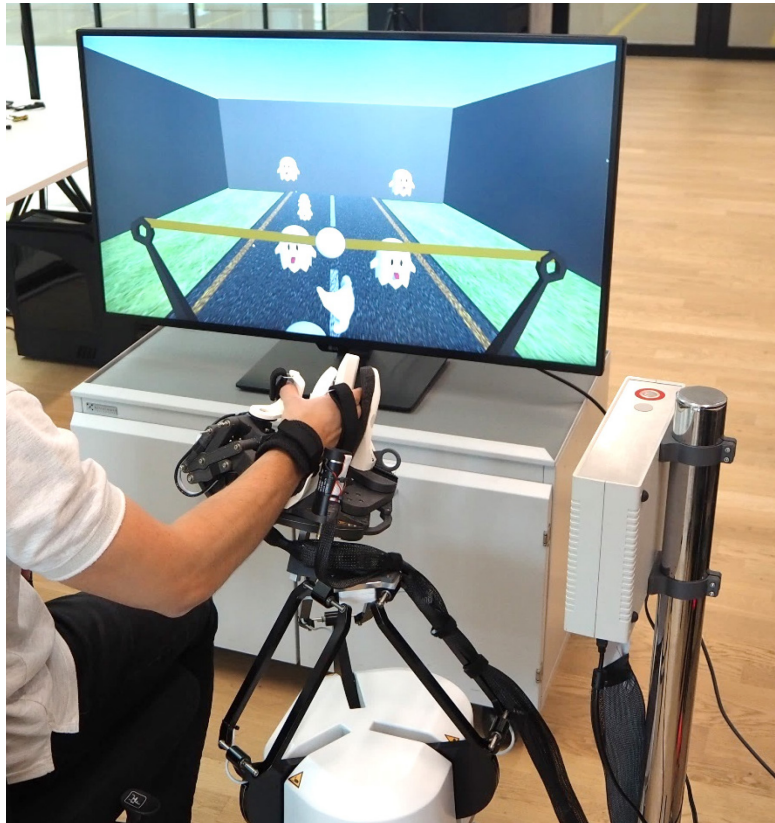

Version 1.0

QuickStart – Anleitung für Lambda.3+

*Verantwortlich: Raphael Rätz, Karin Buetler, Laura Marchal-Crespo*

**Nur für klinische Studien**

# Übersicht

## 1) Roboter

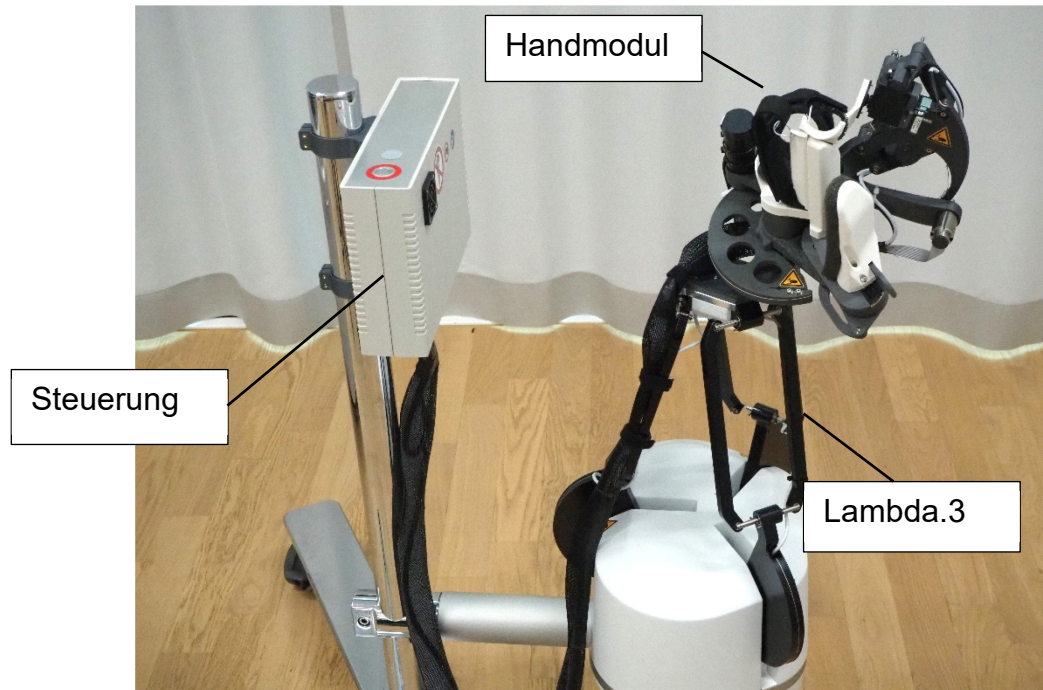

## 2) Handmodul

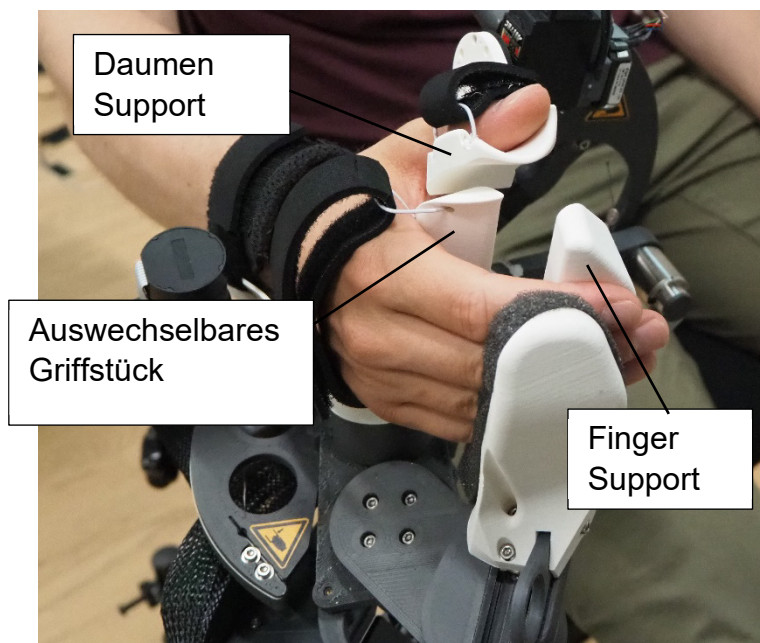

# Einrichten

## 1) Räder Arretieren

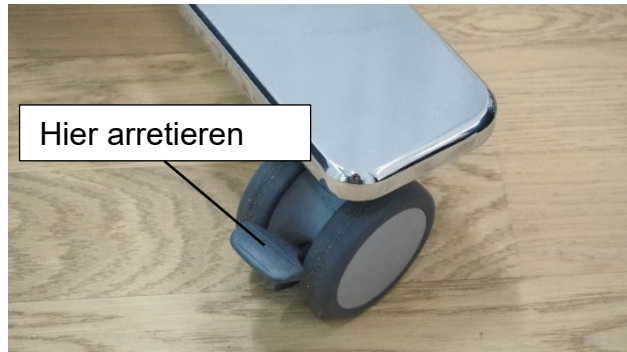

## 2) Roboter Starten

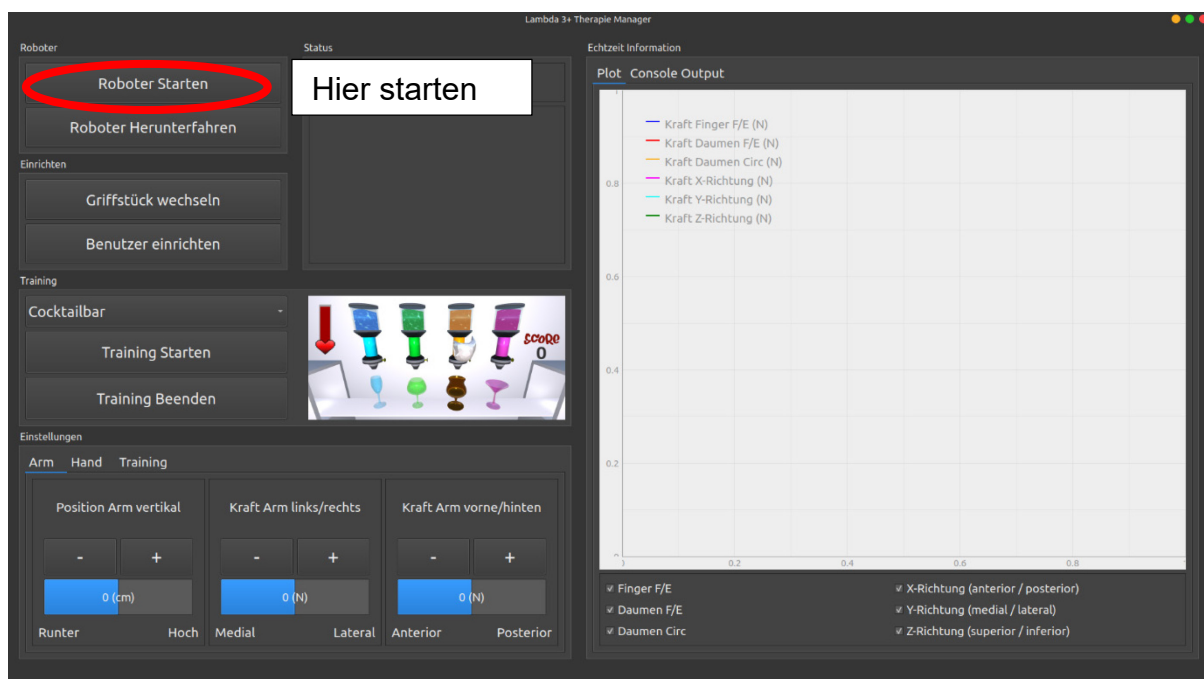



## 3) Griffstück auswechseln

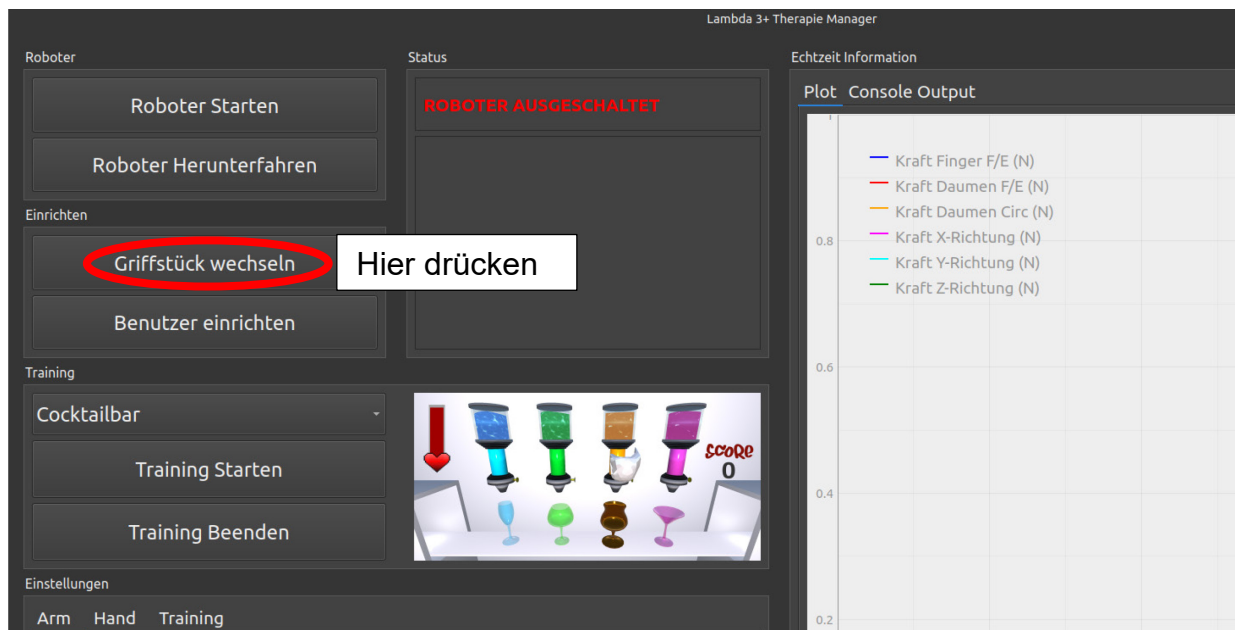

|                   |          |          |          |          |
|-------------------|----------|----------|----------|----------|
| Handlänge (mm)    | 165 ± 10 | 180 ± 10 | 196 ± 10 | 211 ± 10 |
| Empfohlene Grösse | S        | SM       | ML       | L        |

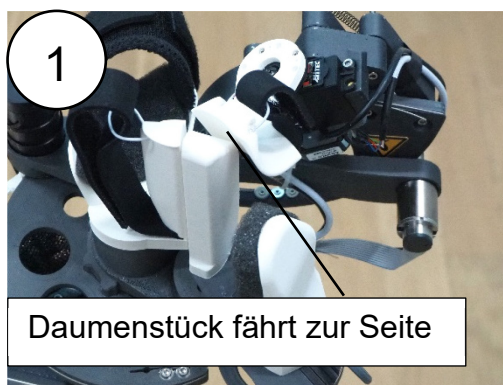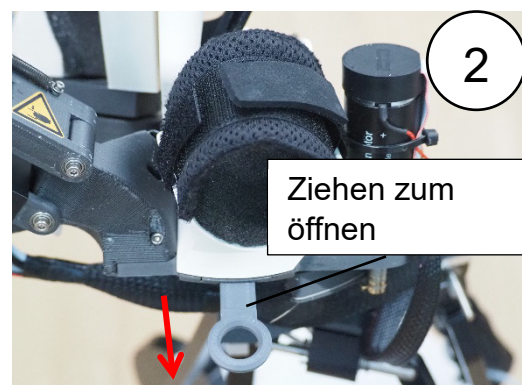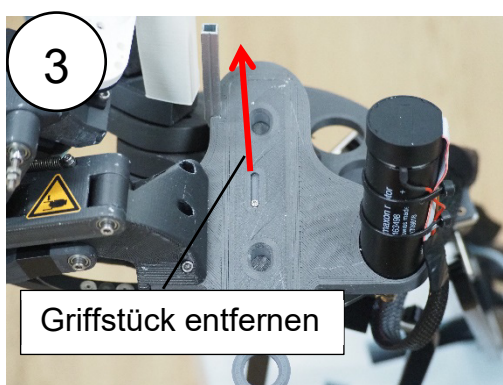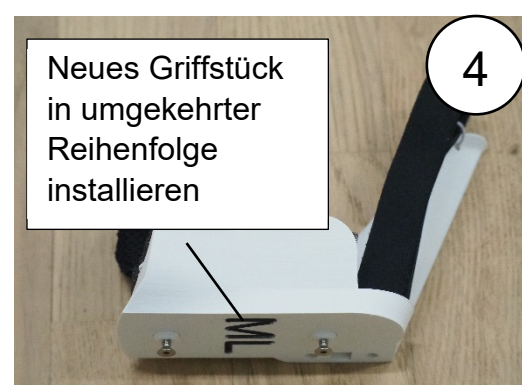

# Benutzer Einrichten

## 1) Hand fixieren

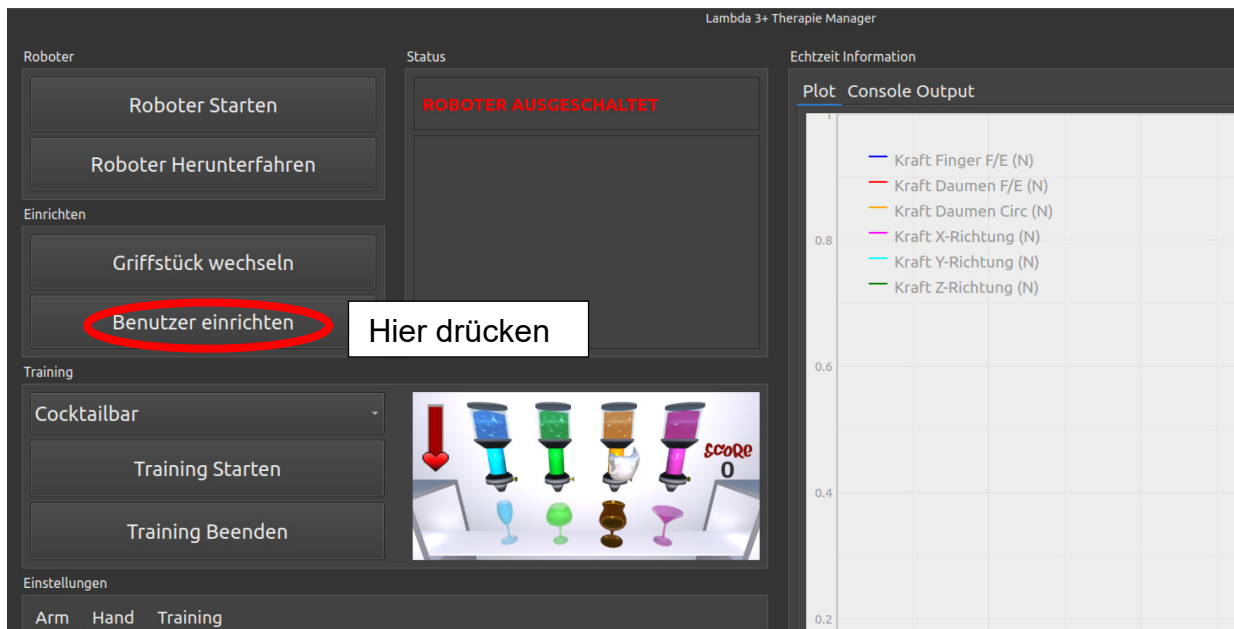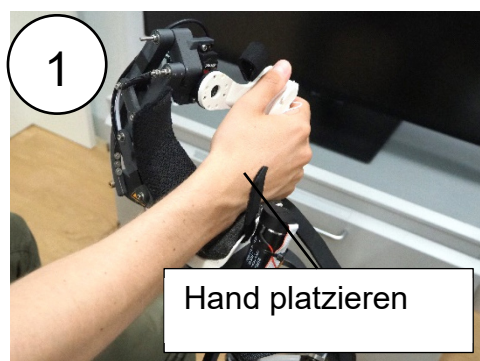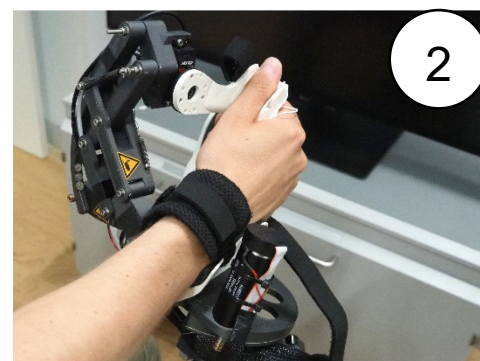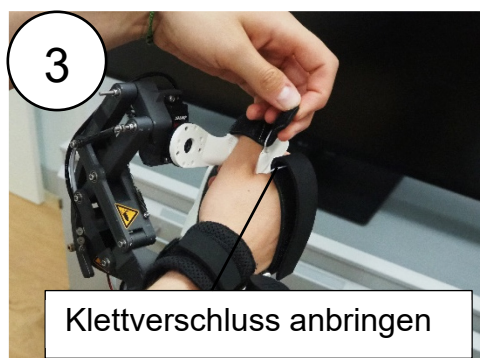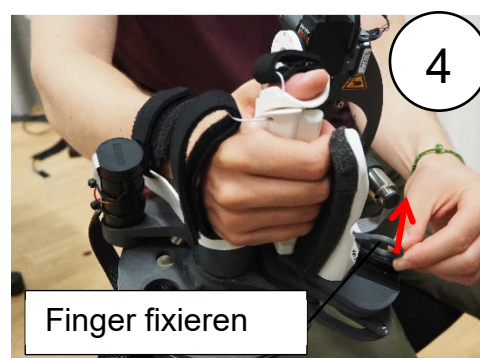

# Betrieb & Notaus

## 1) Notaus

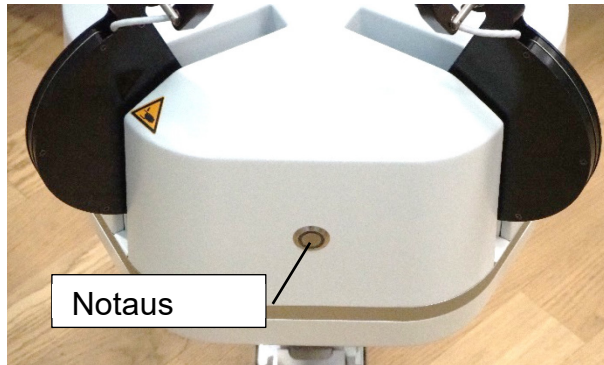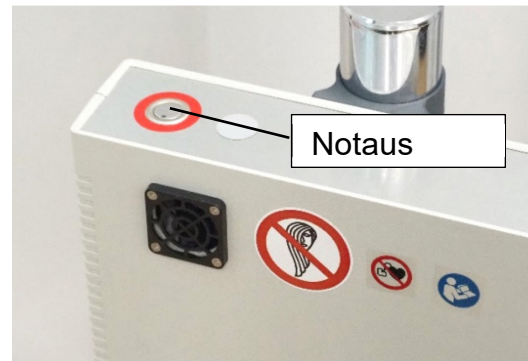

## 2) Spiel starten

The screenshot shows the "Lambda 3+ Therapie Manager" software interface. The interface is divided into several sections: "Roboter", "Status", "Einrichten", "Training", and "Einstellungen".

- Roboter:** Contains buttons for "Roboter Starten", "Roboter Herunterfahren", "Griffstück wechseln", and "Benutzer einrichten".
- Status:** Displays "ROBOTER BEREIT" in green.
- Einrichten:** Contains buttons for "Griffstück wechseln" and "Benutzer einrichten".
- Training:** Contains buttons for "Cocktailbar", "Training Starten", and "Training Beenden". The "Cocktailbar" button is circled in red, with a white label "Hier auswählen" pointing to it. The "Training Starten" button is also circled in red, with a white label "Hier starten" pointing to it.
- Einstellungen:** Contains sub-sections for "Arm", "Hand", and "Training". The "Arm" sub-section has buttons for "Position Arm vertikal", "Kraft Arm links/rechts", and "Kraft Arm vorne/hinten". These buttons are circled in red, with a white label "Optional: zusätzliche Einstellungen" pointing to them.
- Echtzeit Information:** Displays a "Plot Console Output" showing real-time data for various force components (Kraft Finger Fx, Kraft Daumen Fx, Kraft Daumen Cy, Kraft X-Richtung, Kraft Y-Richtung, Kraft Z-Richtung) over time.



# Sicherheitshinweise

## 1) Exklusionskriterien

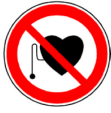

Patienten und Benutzer mit Herzschrittmachern, Insulinpumpen oder anderen medizinisch aktiven implantierbaren oder nicht-implantierbaren Geräten dürfen das System NICHT verwenden (wegen möglicher elektromagnetischer Störungen des Lambda.3+ Systems)

## 2) Zu Beachtende Stellen am Roboter

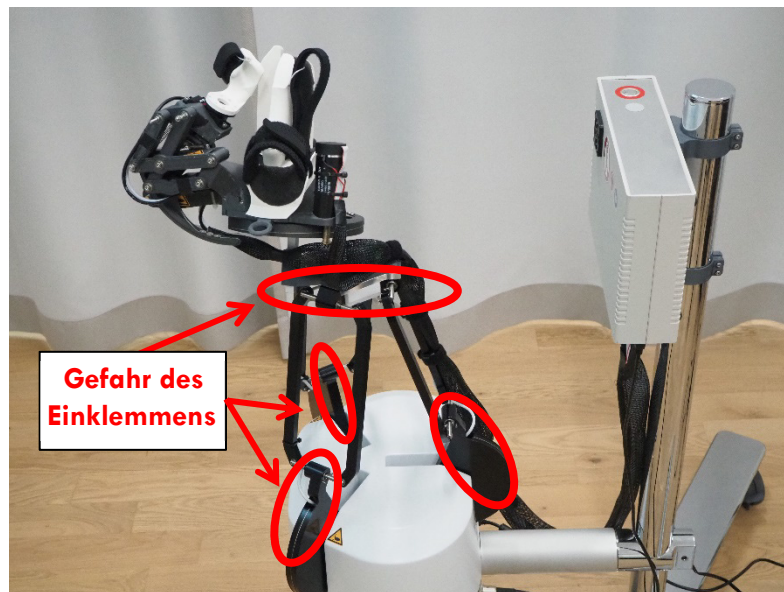

Figure 1 - Potenziell gefährliche Zonen am Lambda.3

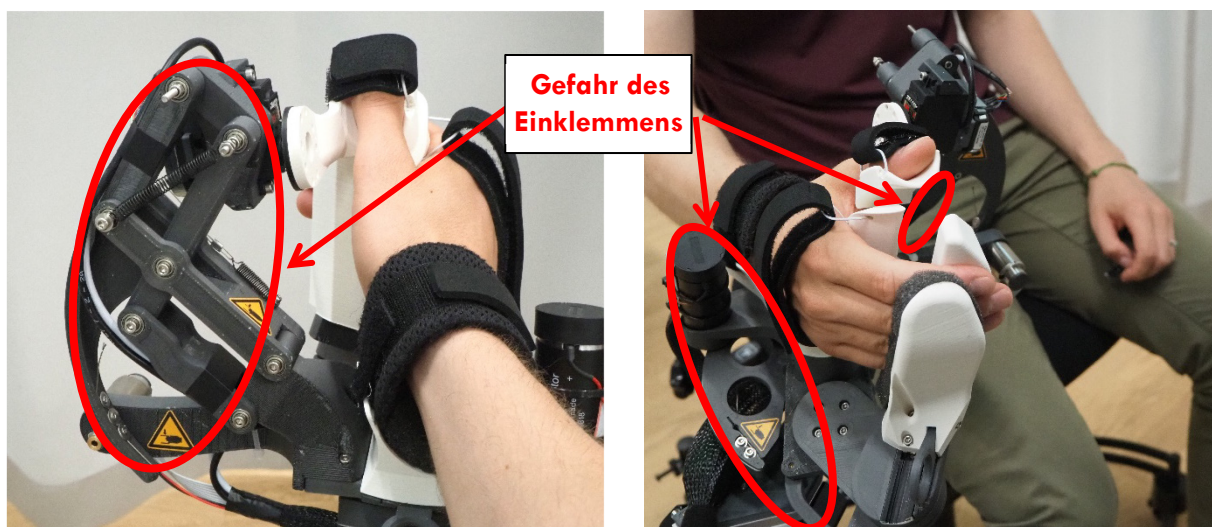

Figure 2 - Potenziell gefährliche Zonen am Handmodul
