# Supplementary material for: Enhancing Stroke Rehabilitation with Whole-Hand Haptic Rendering: Development and Clinical Usability Evaluation of a Novel Upper-Limb Rehabilitation Device
Source: Research Square preprint supplement (doi:10.21203/rs.3.rs-4155027/v1), 2024-03-28
Supplement: Supplementary file [file ee63691622d6d9b35ad8bf35.pdf]

# 1 Questionnaires

Table 1: System Usability Scale (SUS) questions. The therapists completed two SUS questionnaires, where term *system* was replaced by *robot* and *graphical user interface (GUI)* respectively for finer granularity. Items that are inverted in the analysis are marked with (R).

| Nr.  | Question                                                                                               |
|------|--------------------------------------------------------------------------------------------------------|
| Q1:  | I think that I would like to use this <i>system</i> frequently.                                        |
| Q2:  | I found the <i>system</i> unnecessarily complex. (R)                                                   |
| Q3:  | I thought the <i>system</i> was easy to use.                                                           |
| Q4:  | I think that I would need the support of a technical person to be able to use this <i>system</i> . (R) |
| Q5:  | I found the various functions in this <i>system</i> were well integrated.                              |
| Q6:  | I thought there was too much inconsistency in this <i>system</i> . (R)                                 |
| Q7:  | I would imagine that most people would learn to use this <i>system</i> very quickly.                   |
| Q8:  | I found the <i>system</i> very cumbersome to use. (R)                                                  |
| Q9:  | I felt very confident using the <i>system</i> .                                                        |
| Q10: | I needed to learn a lot of things before I could get going with this <i>system</i> . (R)               |

Table 2: Perceived Usefulness (PU) questionnaire.

| Nr. | Question                                                                     |
|-----|------------------------------------------------------------------------------|
| Q1: | Using the system in my job would enable me to accomplish tasks more quickly. |
| Q2: | Using the system would improve my job performance.                           |
| Q3: | Using the system in my job would increase my productivity.                   |
| Q4: | Using the system would enhance my effectiveness on the job.                  |
| Q5: | Using the system would make it easier to do my job.                          |
| Q6: | I would find the system useful in my job.                                    |

Table 3: Interest/Enjoyment subscale of the Intrinsic Motivation Inventory (IMI) questionnaire. Items that are inverted in the analysis are marked with (R)

| Nr. | Question                                                                     |
|-----|------------------------------------------------------------------------------|
| Q1: | I enjoyed doing this activity very much.                                     |
| Q2: | This activity was fun to do.                                                 |
| Q3: | I thought this was a boring activity. (R)                                    |
| Q4: | This activity did not hold my attention at all. (R)                          |
| Q5: | I would describe this activity as very interesting.                          |
| Q6: | I thought this activity was quite enjoyable.                                 |
| Q7: | While I was doing this activity, I was thinking about how much I enjoyed it. |

## 2 Semi-structured Interviews

Table 4: Initial questions for the semi-structured interviews with the therapists.

| Nr. | Question                                                                    |
|-----|-----------------------------------------------------------------------------|
| Q1: | Describe your experience with the therapy system.                           |
| Q2: | What do you think about the games?                                          |
| Q3: | What do you think about the fact that you could feel the objects?           |
| Q4: | What do you think about the user interface?                                 |
| Q5: | What do you think about the robot?                                          |
| Q6: | What do you think about the movements that can be performed with the robot? |
| Q7: | How do you estimate the transferability to activities of daily living?      |
| Q8: | What would you improve?                                                     |
| Q9: | Is there anything else you would like to say?                               |

Table 5: Initial questions for the semi-structured interviews with the patients.

| Nr. | Question                                                          |
|-----|-------------------------------------------------------------------|
| Q1: | Describe your experience with the therapy system.                 |
| Q2: | What do you think about the therapy exercises?                    |
| Q3: | What do you think about the fact that you could feel the objects? |
| Q4: | What do you think about the therapy robot?                        |
| Q5: | What would you improve?                                           |
| Q6: | Is there anything else you would like to say?                     |

### 3 Questionnaire Results

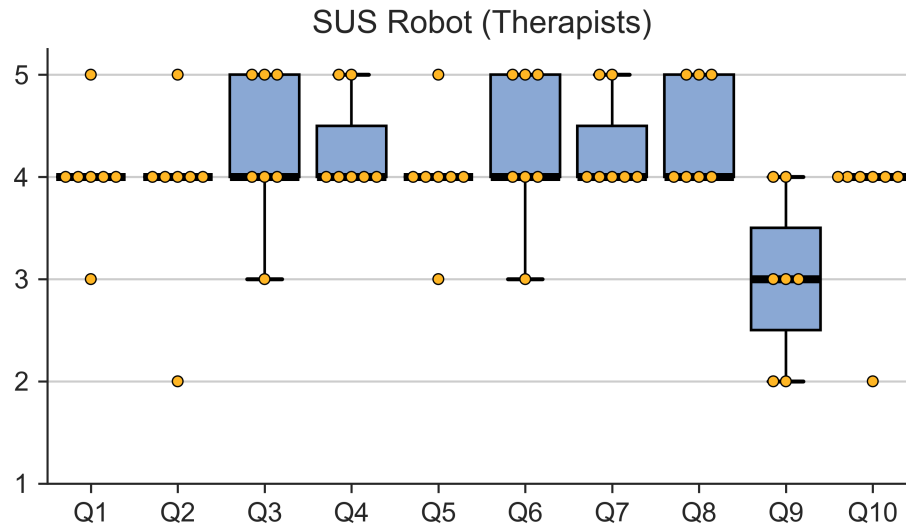

Figure 1: Therapists' responses to the individual questions of the SUS questionnaire on the robotic device. The five-point Likert items ranged from "Strongly disagree" to "Strongly agree".

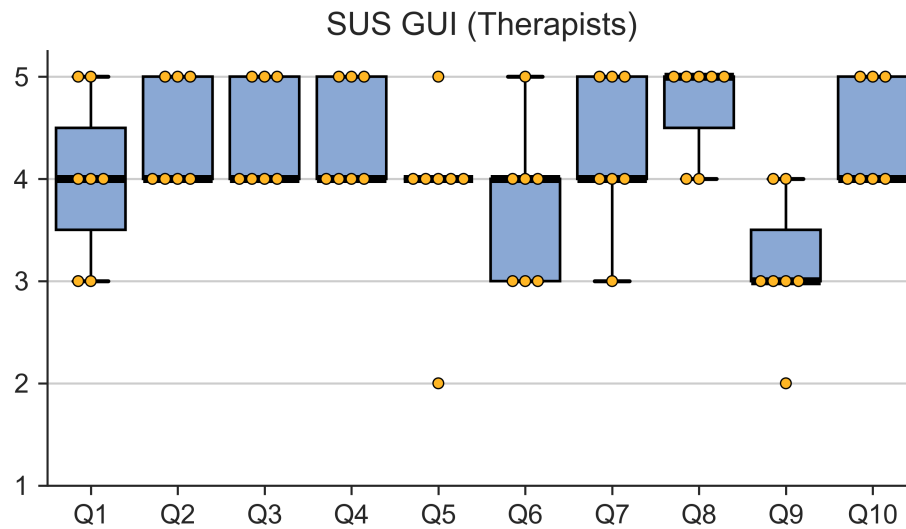

Figure 2: Therapists' responses to the individual questions of the SUS questionnaire on the graphical user interface. The five-point Likert items ranged from "Strongly disagree" to "Strongly agree".

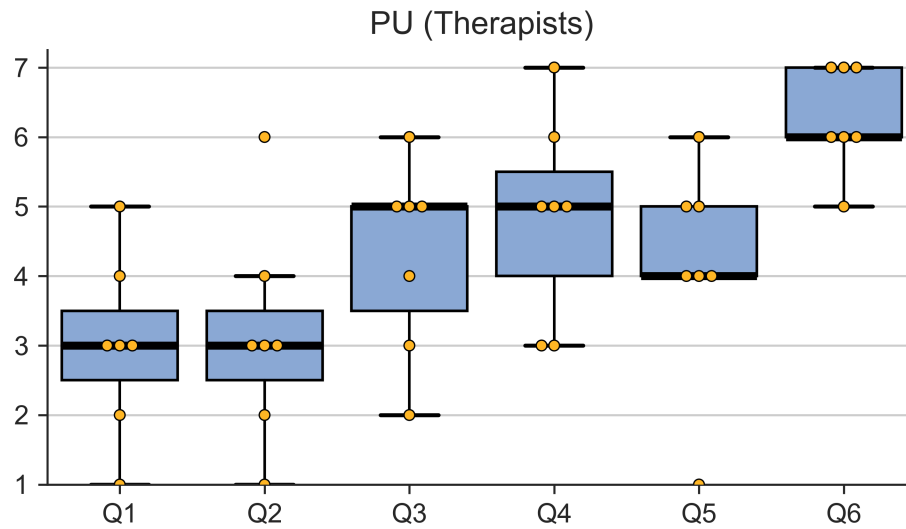

Figure 3: Therapists' responses to the individual questions of the PU questionnaire'. The seven-point Likert items ranged from 'Unlikely' to 'Likely'.

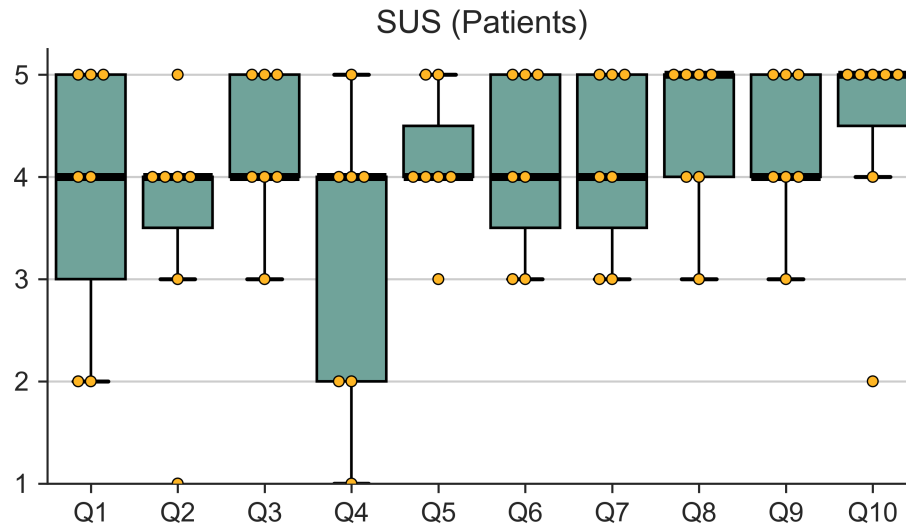

Figure 4: Patients' responses to the individual questions of the SUS questionnaire on the system. The five-point Likert items ranged from "Strongly disagree" to "Strongly agree".

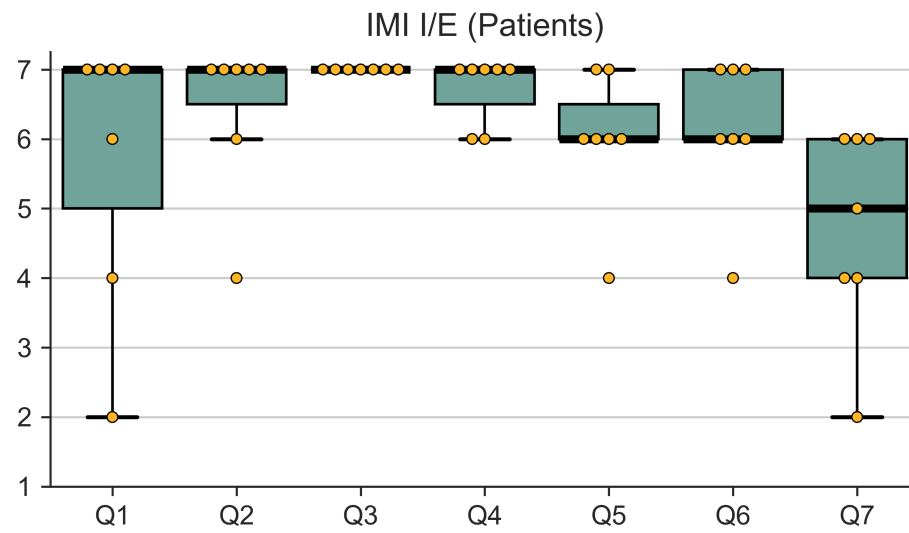

Figure 5: Patients' responses to the individual questions of the Interest/Enjoyment subscale of the IMI. The five-point Likert items ranged from "Not at all true" to "Very true".
